# Supplementary material for: Spatial competition dynamics between reef corals under ocean acidification
Source: PubMed Central journal article supplement (PMC5220319; doi:10.1038/srep40288), 2017-01-09
Supplement: srep40288-s1.pdf [file srep40288-s1.pdf]

1 **Spatial competition dynamics between reef corals under ocean acidification**

2

3 Rael Horwitz\*<sup>1,2,γ</sup>, Mia O. Hoogenboom<sup>3, γ</sup>, Maoz Fine<sup>1,2</sup>

4

5 *<sup>1</sup>The Mina and Everard Goodman Faculty of Life Sciences, Bar-Ilan University, Ramat-Gan*  
6 *52900, Israel*

7 *<sup>2</sup>The Interuniversity Institute for Marine Sciences, Eilat 88103, Israel*

8 *<sup>3</sup> College of Science and Engineering and ARC Centre of Excellence for Coral Reef Studies,*  
9 *James Cook University, Townsville, Queensland 4811, Australia*

10 γ The first two authors made an equal contribution to writing this paper.

11 \*Corresponding author:

12 Rael Horwitz

13 Telephone: +689 (89) 598599

14 Fax: +689 (40) 56 28 15

15 Email: [horwitzrael@gmail.com](mailto:horwitzrael@gmail.com)

16

17

18

19

20

21

22

23

```

24 SI1: Matlab code and parameter estimates for spatial competition model.
25
26 % Matlab Script
27 % Mia Hoogenboom
28 % 10 August 2015
29
30 % Objective = run 2 species general spatial competition model for corals
31 % based on data from Rael Horwitz and Maoz Fine from experimental work in the Gulf of Aqaba
32
33 % Corals were grown under control or high pCO2 (low pH) treatment in pairwise
34 % competition interactions under both intraspecific and interspecific
35 % competition. Corals were also grown individually (no competition)
36 % Experiments were conducted on 6 species
37     % Acropora variabilis
38     % Cyphastrea chalcidicum
39     % Galaxea fascicularis
40     % Pocillopora damicornis
41     % Porites lutea
42     % Stylophora pistillata
43
44 % Mathematical model is as described by:
45 % Crowley PH, Davis HM, Ensminger AL, Fuselier LC, Jackson JK, McLetchie DN (2005)
46 % "A general model of local competition for space" Ecology Letters 8:176-188
47
48 % _____
49 % COMPARE LONG-RUN POPULATION SIZES FOR SPECIES INVOLVED
50 % IN PAIRWISE COMPETITIVE INTERACTIONS USING A 2-SPECIES
51 % SYSTEM OF COUPLED DIFFERENTIAL EQUATIONS
52
53 [t,n]=ode45('gencomp2',[0,50],[0.4,0.4]);
54 % Runs numerical evaluation of the coupled differential equations
55 % initialising with population sizes (% cover) of both species = 40%
56 % runs for 50 model timesteps = years given the data
57 % Where 'gencomp2' is a function as below
58
59 plot(t,n)
60 % plots the model outputs
61
62 ylim([0,1])
63 % sets the y-axis limits between 0 - 1
64
65 legend('Sp 1','Sp 2')
66 % plots the legend on the figure
67 n
68 % outputs long-run proportional cover for the two species

```

```

69 function ftime=gencomp2(t,f)
70 % coupled differential equations for general spatial competition
71 % 2 species, pairwise comparisons
72
73 b = [7.49,11.99];
74 % per capita expansion rate onto unoccupied space (b > 0)
75 % ordered alphabetically Acropora, Cyphastrea, Galaxea, Pocillopora, Porites, Stylophora
76 % values are measured as the proportional change in surface area in the
77 % absence of competition, values adjusted from surface area to horizontal planar area based on
78 % colony shape
79 % b1 = [14.97 4.21 7.42 7.49 1.68 11.99]; CONTROL CONDITIONS
80 % b2 = [10.97 3.03 2.89 5.32 1.25 8.45]; HIGH pCO2
81
82 cmat = [0,0.08;0.25,0];
83 % dimensionless overgrowth coefficients (0 < c < 1)
84 % values are ordered alphabetically in rows and columns, values indicate the decrease in growth %
85 % in the presence of competitors relative to growth in the absence of competitors
86 % values on the main diagonal are set to zero
87 % cmat1 = [0 0.32 0.24 0.26 0.15 0.12;
88 % 0.19 0 0.32 0.28 0.26 0.20;
89 % 0.07 0.08 0 0.19 0.06 0.08;
90 % 0.06 0.07 0.14 0 0.09 0.01;
91 % 0.21 0.60 0.34 0.34 0 0.24;
92 % 0.18 0.43 0.25 0.30 0.20 0]; CONTROL CONDITIONS
93 %
94 % cmat2 = [0 0.22 0.12 0.20 0.12 0.14;
95 % 0.22 0 0.28 0.29 0.24 0.23;
96 % 0.09 0.05 0 0.33 0.02 0.11;
97 % 0.07 0.04 0.00 0 0.05 0.01;
98 % 0.29 0.62 0.36 0.35 0 0.29;
99 % 0.17 0.43 0.23 0.29 0.15 0]; HIGH PCO2 CONDITIONS
100
101 d = [1,1];
102 % per capita mortality rate (d >= 0)
103 % ordered alphabetically Acropora, Cyphastrea, Galaxea, Pocillopora, Porites, Stylophora
104 % assuming that background mortality is equivalent for all species
105 % value set to be lower than the smallest value of 'b' so that births >
106 % deaths and species can, in principle, expand in the environment
107
108
109 ftime(1,1) = f(1) * ((b(1)*(1 - f(1) - f(2))) + (cmat(2,1)*b(1) - cmat(1,2)*b(2))*f(2) - d(1));
110 ftime(2,1) = f(2) * ((b(2)*(1 - f(1) - f(2))) + (cmat(1,2)*b(2) - cmat(2,1)*b(1))*f(1) - d(2));
111
112 end
113

```

114 **Table S1 Carbonate chemistry of seawater.** Carbonate chemistry in present-day (pH 8.1) and  
 115 acidified (pH 7.6) treatments was calculated from  $\text{pH}_{\text{NBS}}$ , total alkalinity (TA), ambient seawater  
 116 temperature and salinity (40 ppm) using the program  $\text{CO}_2\text{SYS}^{57}$ . All data shown are the mean ( $\pm$   
 117 SD). Dissolved inorganic carbon (DIC); aragonite saturation state ( $\Omega_{\text{arag}}$ ).

118

| Treatment    | $\text{pH}_{\text{NBS}}$ | TA<br>( $\mu\text{eq kg}^{-1}$ ) | $p\text{CO}_2$<br>( $\mu\text{atm}$ ) | DIC<br>( $\mu\text{mol kg}^{-1}$ ) | $\text{HCO}_3^-$<br>( $\mu\text{mol kg}^{-1}$ ) | $\text{CO}_3^{2-}$<br>( $\mu\text{mol kg}^{-1}$ ) | $\text{CO}_{2(\text{aq})}$<br>( $\mu\text{mol kg}^{-1}$ ) | $\Omega_{\text{arag}}$ |
|--------------|--------------------------|----------------------------------|---------------------------------------|------------------------------------|-------------------------------------------------|---------------------------------------------------|-----------------------------------------------------------|------------------------|
| Ambient pH   | 8.18<br>(0.01)           | 2501.72<br>(1.2)                 | 400.27<br>(2.46)                      | 2145.7<br>(11.07)                  | 1883.19<br>(18.59)                              | 251.13<br>(7.87)                                  | 11.37<br>(0.33)                                           | 4.02<br>(0.03)         |
| Decreased pH | 7.62<br>(0.02)           | 2504.91<br>(3.63)                | 1795.39<br>(7.4)                      | 2434.69<br>(6.8)                   | 2300.08<br>(8.84)                               | 83.58<br>(3.98)                                   | 51.02<br>(1.67)                                           | 1.26<br>(0.06)         |

119

120

121 **Table S2** Multiple pair-wise comparisons between treatment groups based on Tukey’s HSD for  
 122 each species and each treatment combination, where ‘difference’ is the mean difference in growth  
 123 of each species between each pair of competitors, lower and upper bounds give the 95% confidence  
 124 interval of the difference and probability that the difference is greater than zero (p).

125

| Species            | Treatment     | Other treatment comparison    | Difference | Lower bound | Upper bound | P      |
|--------------------|---------------|-------------------------------|------------|-------------|-------------|--------|
| <i>Acropora</i>    | Interspecific | OA - Control                  | -0.18      | -0.52       | 0.17        | 0.99   |
| <i>Acropora</i>    | None          | OA - Control                  | -1.00      | -1.34       | -0.65       | <0.001 |
| <i>Acropora</i>    | Intraspecific | OA – Control                  | -1.27      | -1.62       | -0.93       | <0.001 |
| <i>Acropora</i>    | Control       | None - Intraspecific          | 1.37       | 1.02        | 1.71        | <0.001 |
| <i>Acropora</i>    | Control       | Intraspecific - Interspecific | 1.64       | 1.29        | 1.98        | <0.001 |
| <i>Acropora</i>    | Control       | None - Interspecific          | 3.00       | 2.66        | 3.35        | <0.001 |
| <i>Acropora</i>    | OA            | Intraspecific - Interspecific | 0.54       | 0.20        | 0.88        | <0.001 |
| <i>Acropora</i>    | OA            | None - Interspecific          | 2.18       | 1.84        | 2.52        | <0.001 |
| <i>Acropora</i>    | OA            | None - Intraspecific          | 1.64       | 1.30        | 1.99        | <0.001 |
| <i>Cyphastrea</i>  | Interspecific | OA - Control                  | -0.41      | -0.75       | -0.06       | <0.001 |
| <i>Cyphastrea</i>  | None          | OA - Control                  | -0.66      | -1.00       | -0.31       | <0.001 |
| <i>Cyphastrea</i>  | Intraspecific | OA – Control                  | -0.55      | -0.89       | -0.20       | <0.001 |
| <i>Cyphastrea</i>  | Control       | Intraspecific - Interspecific | 0.95       | 0.61        | 1.30        | <0.001 |
| <i>Cyphastrea</i>  | Control       | None - Interspecific          | 1.95       | 1.61        | 2.30        | <0.001 |
| <i>Cyphastrea</i>  | Control       | None - Intraspecific          | 1.00       | 0.65        | 1.34        | <0.001 |
| <i>Cyphastrea</i>  | OA            | None - Intraspecific          | 0.88       | 0.54        | 1.23        | <0.001 |
| <i>Cyphastrea</i>  | OA            | Intraspecific - Interspecific | 0.82       | 0.47        | 1.16        | <0.001 |
| <i>Cyphastrea</i>  | OA            | None - Interspecific          | 1.70       | 1.36        | 2.04        | <0.001 |
| <i>Galaxea</i>     | Intraspecific | OA - Control                  | -0.89      | -1.24       | -0.55       | <0.001 |
| <i>Galaxea</i>     | None          | OA - Control                  | -0.99      | -1.33       | -0.64       | <0.001 |
| <i>Galaxea</i>     | Interspecific | OA - Control                  | -0.35      | -0.69       | 0.00        | 0.05   |
| <i>Galaxea</i>     | Control       | Intraspecific - Interspecific | 0.80       | 0.45        | 1.14        | <0.001 |
| <i>Galaxea</i>     | Control       | None - Intraspecific          | 0.81       | 0.47        | 1.15        | <0.001 |
| <i>Galaxea</i>     | Control       | None - Interspecific          | 1.61       | 1.26        | 1.95        | <0.001 |
| <i>Galaxea</i>     | OA            | Intraspecific - Interspecific | 0.25       | -0.10       | 0.59        | 0.63   |
| <i>Galaxea</i>     | OA            | None - Interspecific          | 0.97       | 0.62        | 1.31        | <0.001 |
| <i>Galaxea</i>     | OA            | None - Intraspecific          | 0.72       | 0.37        | 1.06        | <0.001 |
| <i>Pocillopora</i> | Intraspecific | OA - Control                  | -1.01      | -1.35       | -0.66       | <0.001 |
| <i>Pocillopora</i> | None          | OA - Control                  | -0.70      | -1.05       | -0.36       | <0.001 |
| <i>Pocillopora</i> | Interspecific | OA - Control                  | -0.13      | -0.47       | 0.22        | 1.00   |
| <i>Pocillopora</i> | Control       | Intraspecific - Interspecific | 1.10       | 0.76        | 1.44        | <0.001 |
| <i>Pocillopora</i> | Control       | None - Intraspecific          | 1.37       | 1.02        | 1.71        | <0.001 |

|                    |               |                               |       |       |       |        |
|--------------------|---------------|-------------------------------|-------|-------|-------|--------|
| <i>Pocillopora</i> | Control       | None - Interspecific          | 2.47  | 2.12  | 2.81  | <0.001 |
| <i>Pocillopora</i> | OA            | Intraspecific - Interspecific | 0.22  | -0.12 | 0.56  | 0.84   |
| <i>Pocillopora</i> | OA            | None - Interspecific          | 1.89  | 1.55  | 2.24  | <0.001 |
| <i>Pocillopora</i> | OA            | None - Intraspecific          | 1.67  | 1.33  | 2.02  | <0.001 |
| <i>Porites</i>     | Intraspecific | OA - Control                  | -0.24 | -0.58 | 0.10  | 0.69   |
| <i>Porites</i>     | None          | OA - Control                  | -0.37 | -0.71 | -0.03 | 0.02   |
| <i>Porites</i>     | Interspecific | OA - Control                  | -0.26 | -0.61 | 0.08  | 0.47   |
| <i>Porites</i>     | Control       | Intraspecific - Interspecific | 0.83  | 0.49  | 1.17  | <0.001 |
| <i>Porites</i>     | Control       | None - Intraspecific          | 0.79  | 0.45  | 1.13  | <0.001 |
| <i>Porites</i>     | Control       | None - Interspecific          | 1.62  | 1.28  | 1.97  | <0.001 |
| <i>Porites</i>     | OA            | Intraspecific - Interspecific | 0.85  | 0.51  | 1.20  | <0.001 |
| <i>Porites</i>     | OA            | None - Intraspecific          | 0.66  | 0.32  | 1.01  | <0.001 |
| <i>Porites</i>     | OA            | None - Interspecific          | 1.51  | 1.17  | 1.86  | <0.001 |
| <i>Stylophora</i>  | None          | OA - Control                  | -1.01 | -1.35 | -0.66 | <0.001 |
| <i>Stylophora</i>  | Interspecific | OA - Control                  | -0.04 | -0.38 | 0.31  | 1.00   |
| <i>Stylophora</i>  | Intraspecific | OA - Control                  | -1.14 | -1.48 | -0.79 | <0.001 |
| <i>Stylophora</i>  | Control       | None - Intraspecific          | 1.72  | 1.37  | 2.06  | <0.001 |
| <i>Stylophora</i>  | Control       | Intraspecific - Interspecific | 1.85  | 1.50  | 2.19  | <0.001 |
| <i>Stylophora</i>  | Control       | None - Interspecific          | 3.57  | 3.22  | 3.91  | <0.001 |
| <i>Stylophora</i>  | OA            | None - Intraspecific          | 1.85  | 1.51  | 2.19  | <0.001 |
| <i>Stylophora</i>  | OA            | Intraspecific - Interspecific | 0.75  | 0.40  | 1.09  | <0.001 |
| <i>Stylophora</i>  | OA            | None - Interspecific          | 2.60  | 2.25  | 2.94  | <0.001 |

126

127

128 **Table S3** Multiple pair-wise comparisons between treatment groups based on Tukey's HSD for  
 129 each species and each pair of competitors. Pair-wise comparisons show the effects of one  
 130 competitor on each species relative to the effects of another competitor where 'difference' is the  
 131 mean difference in growth of each species between each pair of competitors, lower and upper  
 132 bounds give the 95% confidence interval of the difference and probability that the difference is  
 133 greater than zero (p).

134

| Species           | Effect of competitor A on Species compared with effect of competitor B on Species | Difference | Lower bound | Upper bound | p      |
|-------------------|-----------------------------------------------------------------------------------|------------|-------------|-------------|--------|
| <i>Acropora</i>   | Acropora:Galaxea-Acropora:Cyphastrea                                              | -0.82      | -1.23       | -0.42       | <0.001 |
| <i>Acropora</i>   | Acropora:Pocillopora-Acropora:Cyphastrea                                          | -0.90      | -1.30       | -0.50       | <0.001 |
| <i>Acropora</i>   | Acropora:Pocillopora-Acropora:Galaxea                                             | -0.08      | -0.48       | 0.33        | 1.00   |
| <i>Acropora</i>   | Acropora:Porites-Acropora:Cyphastrea                                              | 0.13       | -0.28       | 0.53        | 1.00   |
| <i>Acropora</i>   | Acropora:Porites-Acropora:Galaxea                                                 | 0.95       | 0.55        | 1.35        | <0.001 |
| <i>Acropora</i>   | Acropora:Porites-Acropora:Pocillopora                                             | 1.03       | 0.62        | 1.43        | <0.001 |
| <i>Acropora</i>   | Acropora:Stylophora-Acropora:Cyphastrea                                           | -0.33      | -0.74       | 0.07        | 0.34   |
| <i>Acropora</i>   | Acropora:Stylophora-Acropora:Galaxea                                              | 0.49       | 0.09        | 0.90        | <0.001 |
| <i>Acropora</i>   | Acropora:Stylophora-Acropora:Pocillopora                                          | 0.57       | 0.16        | 0.97        | <0.001 |
| <i>Acropora</i>   | Acropora:Stylophora-Acropora:Porites                                              | -0.46      | -0.86       | -0.05       | 0.01   |
| <i>Cyphastrea</i> | Cyphastrea:Galaxea-Cyphastrea:Acropora                                            | -0.98      | -1.39       | -0.58       | <0.001 |
| <i>Cyphastrea</i> | Cyphastrea:Pocillopora-Cyphastrea:Acropora                                        | -1.07      | -1.48       | -0.67       | <0.001 |
| <i>Cyphastrea</i> | Cyphastrea:Pocillopora-Cyphastrea:Galaxea                                         | -0.09      | -0.49       | 0.32        | 1.00   |
| <i>Cyphastrea</i> | Cyphastrea:Porites-Cyphastrea:Acropora                                            | 0.69       | 0.28        | 1.09        | <0.001 |
| <i>Cyphastrea</i> | Cyphastrea:Porites-Cyphastrea:Galaxea                                             | 1.67       | 1.27        | 2.08        | <0.001 |
| <i>Cyphastrea</i> | Cyphastrea:Porites-Cyphastrea:Pocillopora                                         | 1.76       | 1.35        | 2.16        | <0.001 |
| <i>Cyphastrea</i> | Cyphastrea:Stylophora-Cyphastrea:Acropora                                         | 0.41       | 0.01        | 0.82        | 0.04   |
| <i>Cyphastrea</i> | Cyphastrea:Stylophora-Cyphastrea:Galaxea                                          | 1.40       | 0.99        | 1.80        | <0.001 |
| <i>Cyphastrea</i> | Cyphastrea:Stylophora-Cyphastrea:Pocillopora                                      | 1.49       | 1.08        | 1.89        | <0.001 |
| <i>Cyphastrea</i> | Cyphastrea:Stylophora-Cyphastrea:Porites                                          | -0.27      | -0.68       | 0.13        | 0.78   |
| <i>Galaxea</i>    | Galaxea:Stylophora-Galaxea:Acropora                                               | 0.15       | -0.25       | 0.56        | 1.00   |
| <i>Galaxea</i>    | Galaxea:Stylophora-Galaxea:Cyphastrea                                             | -0.23      | -0.63       | 0.18        | 0.97   |
| <i>Galaxea</i>    | Galaxea:Stylophora-Galaxea:Pocillopora                                            | 0.52       | 0.12        | 0.93        | <0.001 |
| <i>Galaxea</i>    | Galaxea:Stylophora-Galaxea:Porites                                                | -0.28      | -0.68       | 0.13        | 0.74   |
| <i>Galaxea</i>    | Galaxea:Porites-Galaxea:Acropora                                                  | 0.43       | 0.03        | 0.84        | 0.02   |
| <i>Galaxea</i>    | Galaxea:Porites-Galaxea:Cyphastrea                                                | 0.05       | -0.35       | 0.46        | 1.00   |
| <i>Galaxea</i>    | Galaxea:Porites-Galaxea:Pocillopora                                               | 0.80       | 0.40        | 1.21        | <0.001 |

|                    |                                               |       |       |       |        |
|--------------------|-----------------------------------------------|-------|-------|-------|--------|
| <i>Galaxea</i>     | Galaxea:Pocillopora-Galaxea:Acropora          | -0.37 | -0.78 | 0.03  | 0.13   |
| <i>Galaxea</i>     | Galaxea:Pocillopora-Galaxea:Cyphastrea        | -0.75 | -1.16 | -0.35 | <0.001 |
| <i>Galaxea</i>     | Galaxea:Cyphastrea-Galaxea:Acropora           | 0.38  | -0.02 | 0.78  | 0.11   |
| <i>Pocillopora</i> | Pocillopora:Stylophora-Pocillopora:Acropora   | 0.18  | -0.22 | 0.59  | 1.00   |
| <i>Pocillopora</i> | Pocillopora:Stylophora-Pocillopora:Cyphastrea | 0.02  | -0.38 | 0.43  | 1.00   |
| <i>Pocillopora</i> | Pocillopora:Stylophora-Pocillopora:Galaxea    | 0.18  | -0.22 | 0.59  | 1.00   |
| <i>Pocillopora</i> | Pocillopora:Stylophora-Pocillopora:Porites    | -0.14 | -0.54 | 0.27  | 1.00   |
| <i>Pocillopora</i> | Pocillopora:Galaxea-Pocillopora:Acropora      | 0.00  | -0.41 | 0.40  | 1.00   |
| <i>Pocillopora</i> | Pocillopora:Galaxea-Pocillopora:Cyphastrea    | -0.16 | -0.56 | 0.25  | 1.00   |
| <i>Pocillopora</i> | Pocillopora:Porites-Pocillopora:Cyphastrea    | 0.16  | -0.24 | 0.57  | 1.00   |
| <i>Pocillopora</i> | Pocillopora:Porites-Pocillopora:Galaxea       | 0.32  | -0.08 | 0.72  | 0.42   |
| <i>Pocillopora</i> | Pocillopora:Porites-Pocillopora:Acropora      | 0.32  | -0.09 | 0.72  | 0.43   |
| <i>Pocillopora</i> | Pocillopora:Cyphastrea-Pocillopora:Acropora   | 0.16  | -0.25 | 0.56  | 1.00   |
| <i>Porites</i>     | Porites:Pocillopora-Porites:Acropora          | -0.28 | -0.69 | 0.12  | 0.70   |
| <i>Porites</i>     | Porites:Pocillopora-Porites:Cyphastrea        | -0.61 | -1.01 | -0.20 | <0.001 |
| <i>Porites</i>     | Porites:Pocillopora-Porites:Galaxea           | 0.14  | -0.27 | 0.54  | 1.00   |
| <i>Porites</i>     | Porites:Stylophora-Porites:Acropora           | 0.12  | -0.29 | 0.52  | 1.00   |
| <i>Porites</i>     | Porites:Stylophora-Porites:Cyphastrea         | -0.21 | -0.61 | 0.20  | 0.99   |
| <i>Porites</i>     | Porites:Stylophora-Porites:Galaxea            | 0.54  | 0.13  | 0.94  | <0.001 |
| <i>Porites</i>     | Porites:Stylophora-Porites:Pocillopora        | 0.40  | 0.00  | 0.81  | 0.05   |
| <i>Porites</i>     | Porites:Galaxea-Porites:Acropora              | -0.42 | -0.82 | -0.02 | 0.03   |
| <i>Porites</i>     | Porites:Galaxea-Porites:Cyphastrea            | -0.75 | -1.15 | -0.34 | <0.001 |
| <i>Porites</i>     | Porites:Cyphastrea-Porites:Acropora           | 0.33  | -0.08 | 0.73  | 0.38   |
| <i>Stylophora</i>  | Stylophora:Porites-Stylophora:Acropora        | 0.77  | 0.37  | 1.17  | <0.001 |
| <i>Stylophora</i>  | Stylophora:Porites-Stylophora:Cyphastrea      | 0.33  | -0.08 | 0.73  | 0.38   |
| <i>Stylophora</i>  | Stylophora:Porites-Stylophora:Galaxea         | 0.96  | 0.56  | 1.37  | <0.001 |
| <i>Stylophora</i>  | Stylophora:Porites-Stylophora:Pocillopora     | 2.10  | 1.70  | 2.50  | <0.001 |
| <i>Stylophora</i>  | Stylophora:Pocillopora-Stylophora:Acropora    | -1.33 | -1.73 | -0.93 | <0.001 |
| <i>Stylophora</i>  | Stylophora:Pocillopora-Stylophora:Cyphastrea  | -1.77 | -2.18 | -1.37 | <0.001 |
| <i>Stylophora</i>  | Stylophora:Pocillopora-Stylophora:Galaxea     | -1.14 | -1.54 | -0.73 | <0.001 |
| <i>Stylophora</i>  | Stylophora:Galaxea-Stylophora:Acropora        | -0.19 | -0.60 | 0.21  | 1.00   |
| <i>Stylophora</i>  | Stylophora:Galaxea-Stylophora:Cyphastrea      | -0.64 | -1.04 | -0.23 | <0.001 |
| <i>Stylophora</i>  | Stylophora:Cyphastrea-Stylophora:Acropora     | 0.44  | 0.04  | 0.85  | 0.01   |

135

136

137

138
